# Supplementary material for: Association Between Mobilization Level And Activity of Daily Living Independence in Critically Ill Patients
Source: PubMed Central journal article supplement — Ann Rehabil Med. 2023 Nov 22;47(6):519–27. doi: 10.5535/arm.23056 (PMC10767217; doi:10.5535/arm.23056), 2023-11-22
Supplement: arm-23056-Supplementary-1.pdf [file arm-23056-Supplementary-1.pdf]

**Supplementary Table S1.** Criteria for physiological stability

| Physiological stability variable  | Variable range                                                           |
|-----------------------------------|--------------------------------------------------------------------------|
| <b>Medical stability</b>          |                                                                          |
| Bleeding tendency                 | May not get worse by mobilization                                        |
| Fever                             | 38.5°C or less                                                           |
| Immediately after surgery         | From the day after surgery                                               |
| Bed rest order                    | When the attending physician determines that the condition requires rest |
| <b>Cardiovascular stability</b>   |                                                                          |
| Heart rate                        | 50–120 beats per minute                                                  |
| Mean arterial blood pressure      | 65–110 mmHg                                                              |
| Vasoactive medication infusions   | No increase in vasoactive medications within 24 hours                    |
| <b>Respiratory stability</b>      |                                                                          |
| Fraction of inspired oxygen       | 0.6 or less                                                              |
| Positive end expiratory pressure  | 10 cmH <sub>2</sub> O or less                                            |
| Respiratory rate                  | 30 breaths per minute or less                                            |
| Pulse oximetry oxygen saturations | 90% or greater                                                           |
| <b>Neurological stability</b>     |                                                                          |
| Richmond Agitation-Sedation Score | -2 to 1                                                                  |
| Delirium                          | M6 (able to follow commands)                                             |
| Glasgow Coma Scale                | M6 (able to follow commands)                                             |
