# Supplementary material for: Association Between Mobilization Level And Activity of Daily Living Independence in Critically Ill Patients
Source: PubMed Central journal article supplement — Ann Rehabil Med. 2023 Nov 22;47(6):519–27. doi: 10.5535/arm.23056 (PMC10767217; doi:10.5535/arm.23056), 2023-11-22
Supplement: arm-23056-Supplementary-2.pdf [file arm-23056-Supplementary-2.pdf]

**Supplementary Table S2.** The background information of the participating ICUs and the patients

| Information                                                                                                                     | The participating ICUs (n=9) | A total of the patients included in this study (n=203) |
|---------------------------------------------------------------------------------------------------------------------------------|------------------------------|--------------------------------------------------------|
| Type of hospital                                                                                                                |                              |                                                        |
| Tertiary care hospital                                                                                                          | 6 (67)                       | 132 (65)                                               |
| Secondary care hospital                                                                                                         | 3 (33)                       | 71 (35)                                                |
| Type of ICU                                                                                                                     |                              |                                                        |
| Mixed medical-surgical ICU                                                                                                      | 9 (100)                      | 202 (100)                                              |
| System of ICU                                                                                                                   |                              |                                                        |
| Closed ICU: intensivists have the primary responsibility of treatment to the patients                                           | 3 (33)                       | 63 (31)                                                |
| Mandatory consultant to intensivists at all ICU admission                                                                       | 3 (33)                       | 69 (34)                                                |
| Elective: ICU physician is mainly involved as a consultant                                                                      | 3 (33)                       | 71 (35)                                                |
| Type of professions ordering patient's mobilization                                                                             |                              |                                                        |
| Physician                                                                                                                       | 7 (78)                       | 161 (80)                                               |
| Nurse                                                                                                                           | 1 (11)                       | 21 (10)                                                |
| Physiotherapist                                                                                                                 | 1 (11)                       | 21 (10)                                                |
| The presence of dedicated physiotherapist                                                                                       | 5 (56)                       | 108 (53)                                               |
| Staffing ratio                                                                                                                  |                              |                                                        |
| Physician to patients                                                                                                           | 5.0±2.0                      |                                                        |
| Nurse to patients                                                                                                               | 2.0±0.0                      |                                                        |
| The time from the start of the study to the end of patient registration when the last 25th patient was registered <sup>a)</sup> | 91 (78–139)                  |                                                        |

Values are presented as number (%), mean±standard deviation, or median (IQR).

ICU, intensive care unit.

<sup>a)</sup>The study started on the study start date and ended on the ICU discharge date of the 25th patient.
